# Supplementary material for: Epigallocatechin Gallate Affects the Structure of Chromatosomes, Nucleosomes and Their Complexes with PARP1
Source: Preprints.org preprint supplement (doi:10.20944/preprints202308.1874.v1), 2023-08-29
Supplement: Supplementary file 1 [file supplementary]

***Supplementary materials to***

Epigallocatechin gallate affects the structure of chromatosomes, nucleosomes and their complexes with PARP1

Tatiana V. Andreeva, Natalya V. Maluchenko, Anastasiya V. Efremenko, Alexander V. Lyubitelev, Anna N. Korovina, Dmitry A. Afonin, Mikhail P. Kirpichnikov, Vasily M. Studitsky and Alexey V. Feofanov

Figure S1. Frequency distributions of nucleosomes N(35, 112) by EPR value in the absence and presence of 12 and 50 µM EGCG (mean±SEM, n=3).

Figure S2. Analysis of the complexes of nucleosomes with PARP1, EGCG and NAD+ by non-denaturing PAGE.

Figure S3. Frequency distributions of nucleosomes by EPR value in the absence and presence of 2% DMSO (mean±SEM, n=3).
